# Supplementary material for: Fission yeast Kinesin-8 controls chromosome congression independently of oscillations
Source: Oxford University Press journal article supplement (doi:10.1242/jcs.160465), 2015-01-01
Supplement: jcs160465supp.pdf [file jcs160465supp.pdf]

SUPPLEMENTAL INFORMATION

A

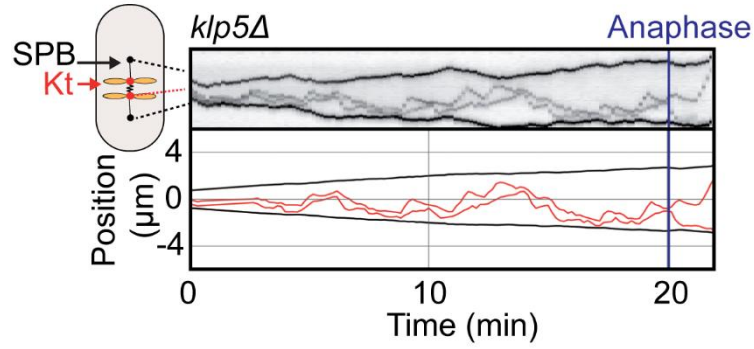

B

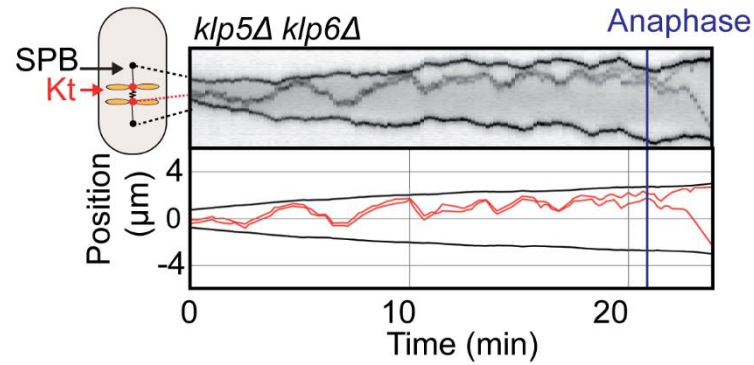

C

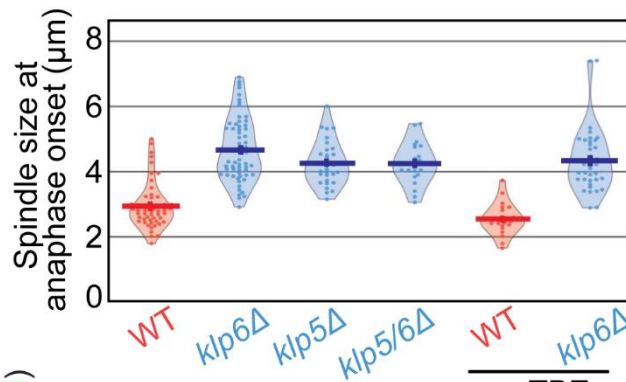

D

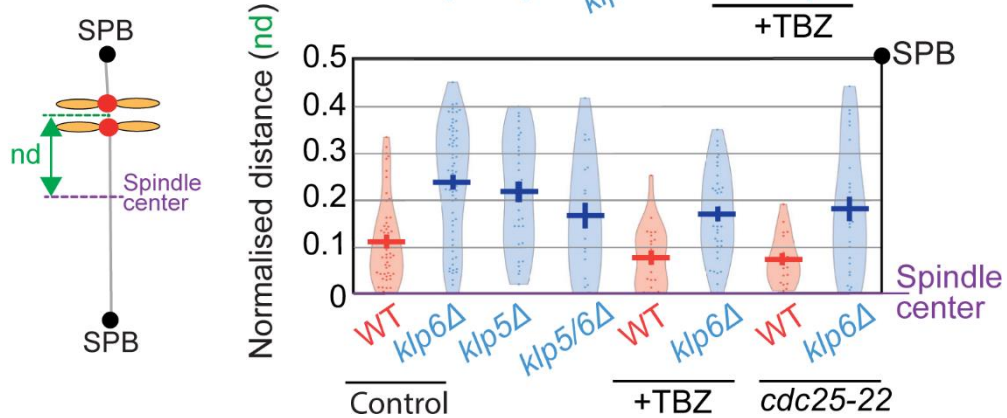

**Figure S1. *klp5Δ* or double mutant *klp5Δ klp6Δ* are deficient for chromosome centering.**

**(A-B)** Typical time-lapse fluorescent images of *klp5Δ* or *klp5Δ klp6Δ* double mutant expressing Cen2-gfp (centromeric region of chromosome 2) and Cdc11-gfp (SPBs) during metaphase and anaphase.  $\Delta t = 10$  s. The lower panel is showing the corresponding trajectories of Cen2 (red) and SPBs (black) projected on a 1-D axis whose origin is the spindle center. **(C)** Spindle size at anaphase onset for various cell type: wild type (n=52, with TBZ n=21), *klp6Δ* (n=63, with TBZ, n=36), *klp5Δ* (n=30), *klp5/6Δ* (n=21). **(D)** Global distribution of the relative distances between Cen2 to the spindle center at anaphase onset in wild type (n=52), *klp6Δ* cells (n=63), *klp5Δ* cells (n=30), *klp5/6Δ* cells (n=21), wild type cells with low dose of TBZ (n=21), *klp6Δ* cells with low dose of TBZ (n=36), *cdc25-22* cells (n=19) and *cdc25-22 klp6Δ cells* (n=26). Each distance  $d$  between sister kinetochores to the spindle center is normalized according to spindle size so that sister kinetochore position varies between 0 (spindle center) to 0.5 (poles).

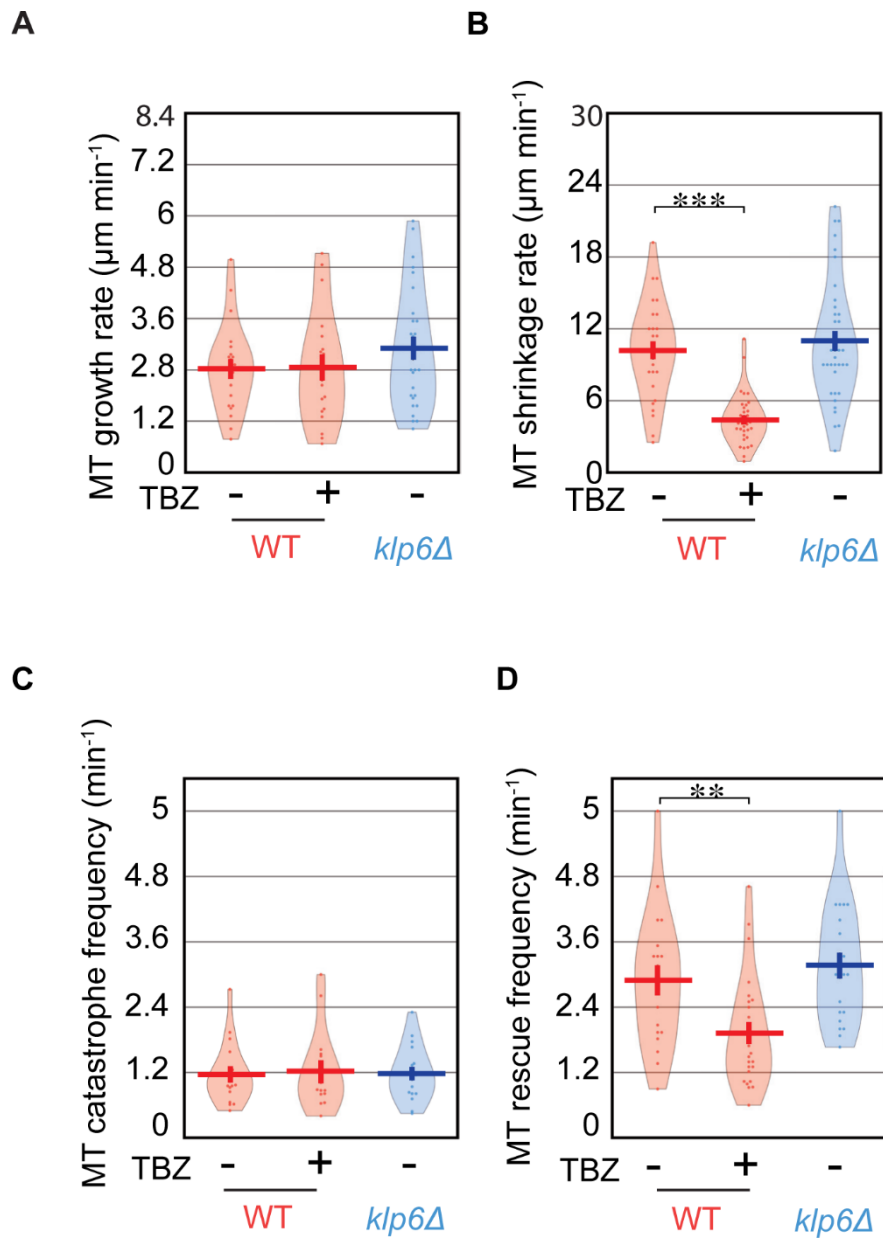

**Figure S2. Analysis of microtubule dynamics in the presence or absence of TBZ.**

(A). Microtubule growth rate for wild type (n=22, with TBZ n=19) and *klp6Δ* (n=27) cells. (B). Microtubule shrinkage rate for wild type (n=29, with TBZ n=33) and *klp6Δ* (n=37) cells. (C). Microtubule catastrophe frequency for wild type (n=19, with TBZ n=15) and *klp6Δ* (n=17) cells. (D). Microtubule rescue frequency for wild type (n=20, with TBZ n=26) and *klp6Δ* (n=21) cells.

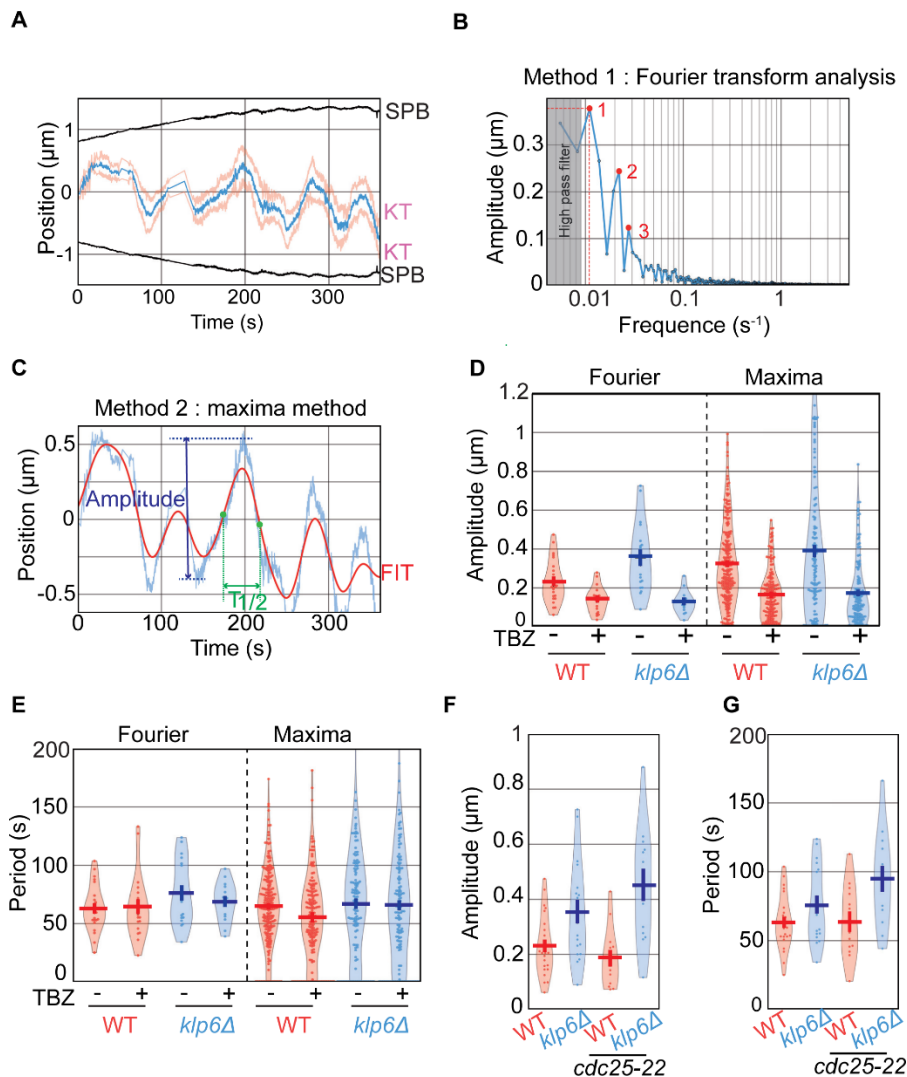

**Figure S3. Characterization of kinetochore oscillation periods and amplitudes.**

(A). Kinetochore (Cen2) trajectories used to illustrate oscillation analysis (frames were taken every 0.1 s). The blue line represents the middle of the Cen2 spots (shown in red). (B) Fourier transform analysis of kinetochore trajectories. The peak of highest amplitude is identified in the Fourier spectrum of each kinetochore trajectories obtained from high frame rate experiments. The corresponding amplitudes are reported as a function of the half periods of oscillations. (C) Position of the middle of Cen2 spots according to time (blue). This trajectory is interpolated by a spline function (red). The local maxima of the interpolated curve are identified and used to determine half periods ( $T_{1/2}$ , horizontal arrow) and amplitudes (A, vertical arrow) in kinetochore trajectories. (D-E). Amplitude and period comparison between the two methods (see B and C) in various cell lines (wild type and *klp6Δ*) and different conditions (presence or absence of low doses of TBZ). Note that the two methods reproduce qualitatively but not quantitatively the differences between wild type or mutant cells. (F-G). Amplitudes and periods in wild type and *klp6Δ* cells in control or *cdc25-22* background. Amplitudes and periods are not significantly different when cells are elongated in a *cdc25-22* background. Amplitude: wild type (n=24, *cdc25-22* n=13), *klp6Δ* (n=18, *cdc25-22* n=13). Period: wild type (n=24, *cdc25-22* n=13), *klp6Δ* (n=18, *cdc25-22* n=13).

**Table S1: List of parameters and default values used in the study**

| <b>Parameter</b> | <b>Description</b>                                                        | <b>value</b> |
|------------------|---------------------------------------------------------------------------|--------------|
| $L_{dep}$        | Factor controlling force load on kinetochore in a length dependent manner | 0.2          |
| $K_{\alpha}$     | Microtubule Attachment/detachment rate per min                            | 3.6          |
| $d_{\alpha}$     | Range of action of Aurora like activity ( $\mu\text{m}$ )                 | 0.05         |
| $\beta$          | Kinetochore orientation parameter                                         | 1            |
| $V_k$            | Kinetochore maximum velocity ( $\mu\text{m}/\text{min}$ )                 | 2.4          |
| $F_k$            | Kinetochore stall force (pN)                                              | 10           |
| $K_c$            | Cohesin spring constant (pN/ $\mu\text{m}$ )                              | 67           |
| $M_k$            | Number of microtubules per kinetochore                                    | 3            |
| $F_{mz}$         | Midzone force generator stall force (pN)                                  | 58           |
| $V_{mz}$         | Midzone force generator maximum velocity ( $\mu\text{m}/\text{min}$ )     | 1.2          |

**Table S2: Strains used in this study**

| <b>Strain number</b> | <b>Genotype</b>                                                                                     | <b>Reference</b> |
|----------------------|-----------------------------------------------------------------------------------------------------|------------------|
| ST1237               | <i>cdc11-gfp::kr cen2(D107)-kanR-ura4+-lacO his7+-lacI-gfp-gfp</i>                                  | This study       |
| ST1266               | <i>cdc11-gfp::kr cen2(D107)-kanR-ura4+-lacO his7+-lacI-gfp-gfp klp5::ura4</i>                       | This study       |
| ST1442               | <i>cdc11-gfp-kr cen2(D107)-kanr-ura4+-lacO_his7+-lacI-gfp-gfp cdc25-22</i>                          | This study       |
| ST1522               | <i>cdc11-gfp-kr cen2(D107)-kanr-ura4+-lacO_his7+-lacI-gfp-gfp cdc25-22 klp6::his3</i>               | This study       |
| ST1375               | <i>h- klp5-GFP::kr leu1-32 ura4-D18 pPT77 nmt1-ura4-mRFP-atb2</i>                                   | This study       |
| ST945                | <i>klp5-GFP cdc25-22 ndc80-CFP-kr cdc11-CFP-kr</i>                                                  | This study       |
| ST1513               | <i>cdc11-gfp-kr cen2(D107)-kanR-ura4+-lacO_his7+-lacI-gfp-gfp klp6::his3<br/>mad2mcherry:CLONAT</i> | This study       |
| ST1513               | <i>ndc80-GFP:kr cdc11-CPF:kr</i>                                                                    | This study       |
| ST1539               | <i>ndc80-GFP:kr cdc11-CPF:kr klp6::his3</i>                                                         | This study       |
| ST1516               | <i>cdc11-gfp-kr cen2(D107)-kanR-ura4+-lacO_his7+-lacI-gfp-gfp klp5::ura4</i>                        | This study       |
| ST1518               | <i>cdc11-gfp-kr cen2(D107)-kanR-ura4+-lacO_his7+-lacI-gfp-gfp klp5::ura4<br/>klp6:his3</i>          | This study       |

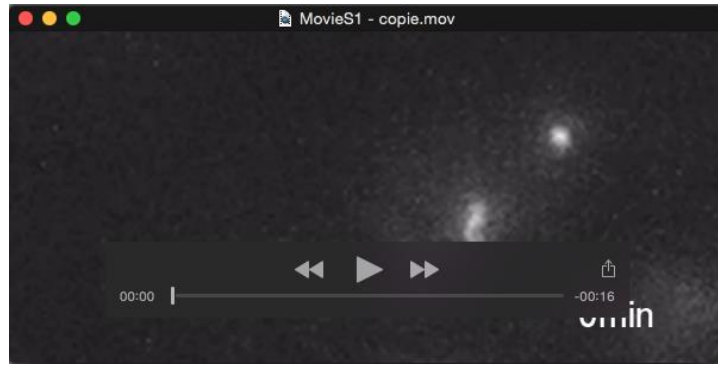

**Movie 1. Fluorescent time-lapse imaging of centromere 2 (Cen2-gfp) and spindle pole (Cdc11-gfp) dynamics in a wild type fission yeast cell.** Frames were taken every 10 s.

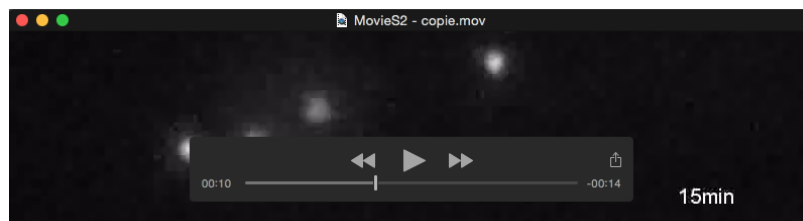

**Movie 2. Fluorescent time-lapse imaging of centromere 2 (Cen2-gfp) and spindle pole (Cdc11-gfp) dynamics in a *klp6Δ* cell.** Frames were taken every 10 s.

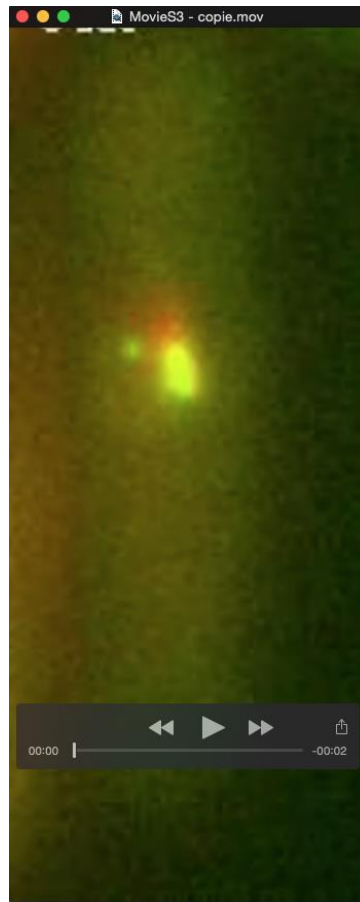

**Movie 3. Fluorescent time-lapse imaging of tubulin (Atb2-rfp) and Kinesin-8 (Klp5-gfp) during metaphase showing Klp5 accumulation at the tip of an intranuclear microtubule bundle.** Frames were taken every 5 s.



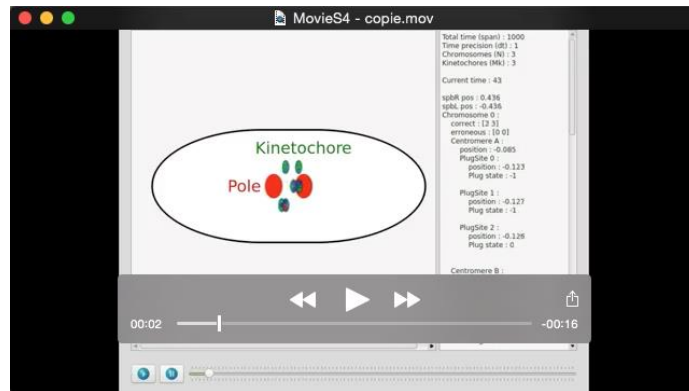

**Movie 4. Cartoon recapitulating a typical simulation calculated with the force balance model of the mitotic spindle.** The position of spindle poles and kinetochores are shown, as well as the attachment state of each attachment site (green = correct attachment, red = incorrect attachment, blue = unattached).
